# Supplementary material for: Direct cation exchange of CdSe nanocrystals into ZnSe enabled by controlled binding between guest cations and organic ligands
Source: Royal Society of Chemistry journal article supplement (doi:10.1039/c9nr05195c), 2019-01-01
Supplement: c9nr05195c1.pdf [file c9nr05195c1.pdf]

## (Electronic Supplementary Information)

# Direct Cation Exchange of CdSe Nanocrystals into ZnSe Enabled by Controlled Binding between Guest Cations and Organic Ligands

*Sooho Lee,<sup>‡a</sup> Da-Eun Yoon,<sup>‡a</sup> Dahin Kim,<sup>a</sup> Do Joong Shin,<sup>a</sup> Byeong Guk Jeong,<sup>a</sup> Dongkyu Lee,<sup>a</sup> Jaehoon Lim,<sup>b</sup> Wan Ki Bae,<sup>c</sup> Hyung-Kyu Lim<sup>\*d</sup> and Doh C. Lee<sup>\*a</sup>*

<sup>a</sup> Department of Chemical and Biomolecular Engineering (BK21+ Program), KAIST Institute for the Nanocentury, Korea Advanced Institute of Science and Technology (KAIST), Daejeon 34141, Korea

<sup>b</sup> Department of Chemical Engineering and Department of Energy System Research, Ajou University, Suwon 16499, Korea

<sup>c</sup> SKKU Advanced Institute of Nano Technology (SAINT), Sungkyunkwan University, Suwon 16419, Korea

<sup>d</sup> Division of Chemical Engineering and Bioengineering, Kangwon National University, Chuncheon 24341, Korea

<sup>‡</sup> These authors contributed equally to this work.

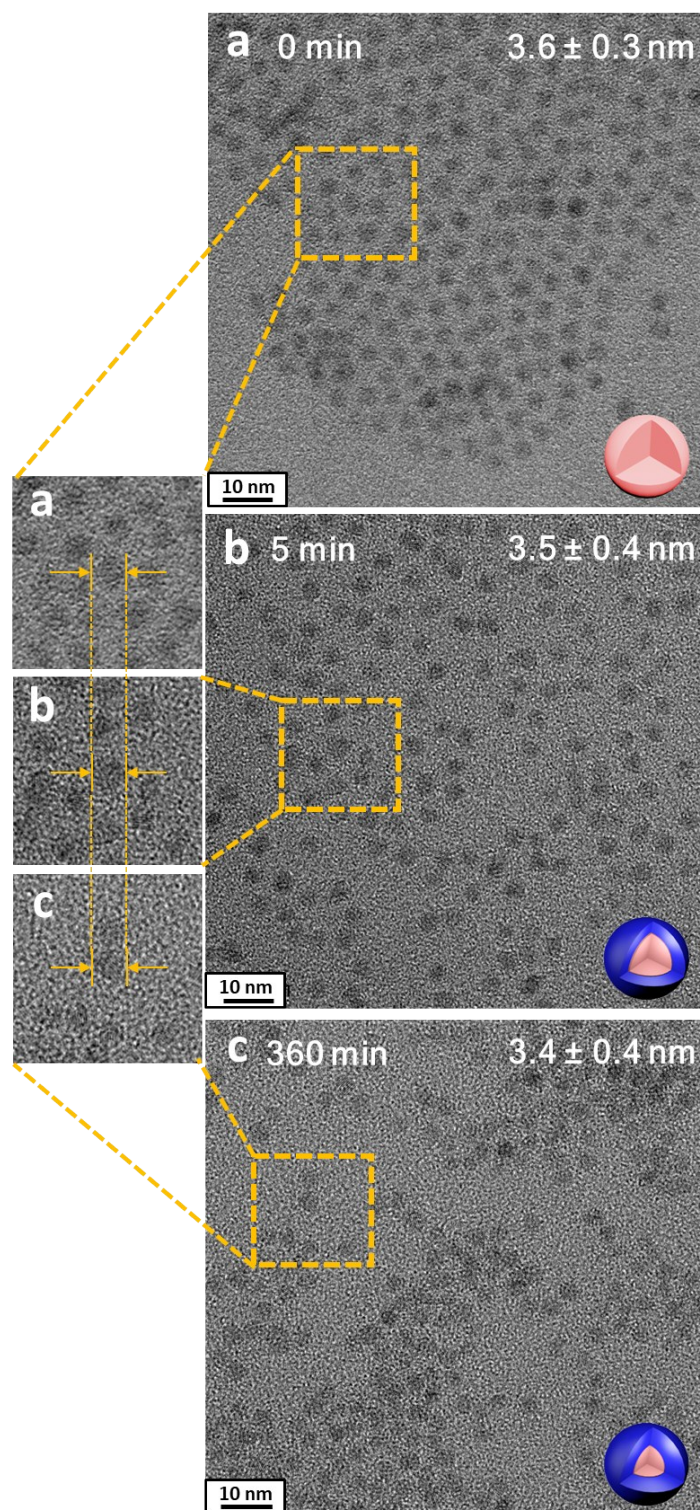

**Figure S1.** TEM images of (a) CdSe (0 min) and cation-exchanged CdSe/ZnSe ((b) 5 min and (c) 360 min) NCs using 0.694 M  $\text{ZnI}_2$  and TOPO at 230 °C.

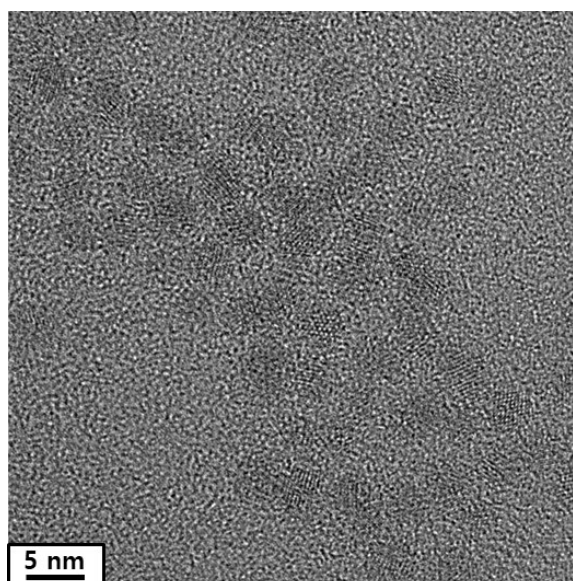

**Figure S2.** High-magnification TEM image of CdSe/ZnSe HNCs that were produced *via* cation exchange using 0.694 M ZnI<sub>2</sub> and TOPO for 360 min at 230 °C.

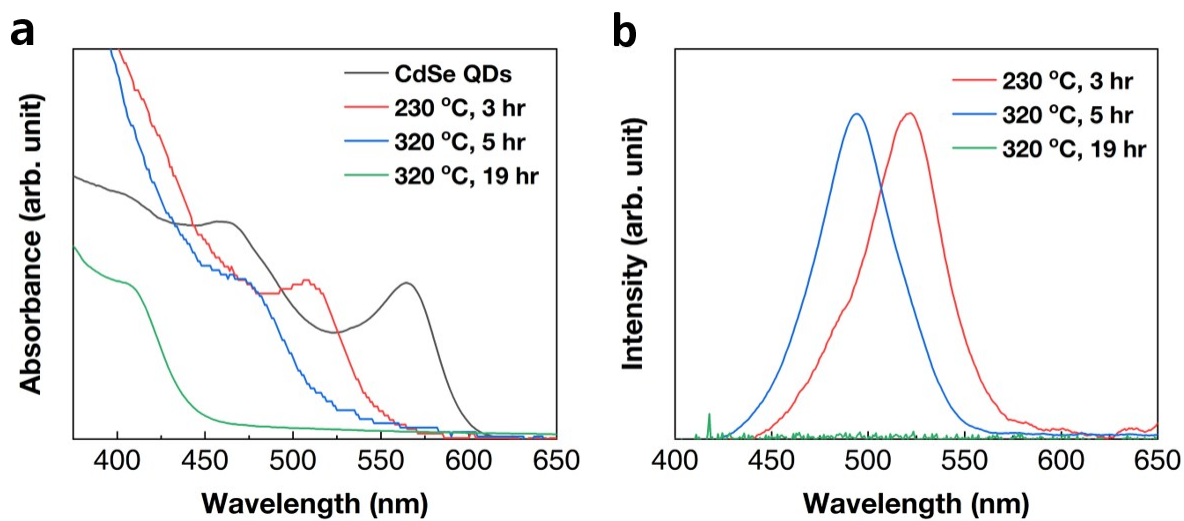

**Figure S3.** (a) UV-vis absorption spectra and (b) PL spectra of CdSe QDs before and after cation exchange reaction using 0.694 M ZnI<sub>2</sub> and TOPO.

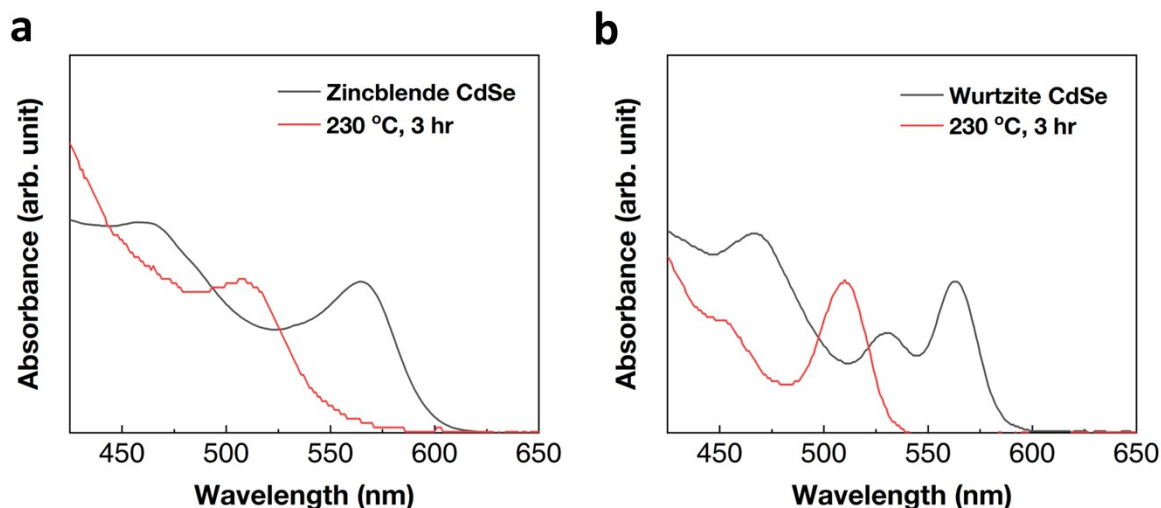

**Figure S4.** Absorption spectra of QDs with (a) zinc blende and (b) wurtzite crystal structure before and after cation exchange reaction using 0.694 M  $\text{ZnI}_2$  and TOPO at 230 °C.

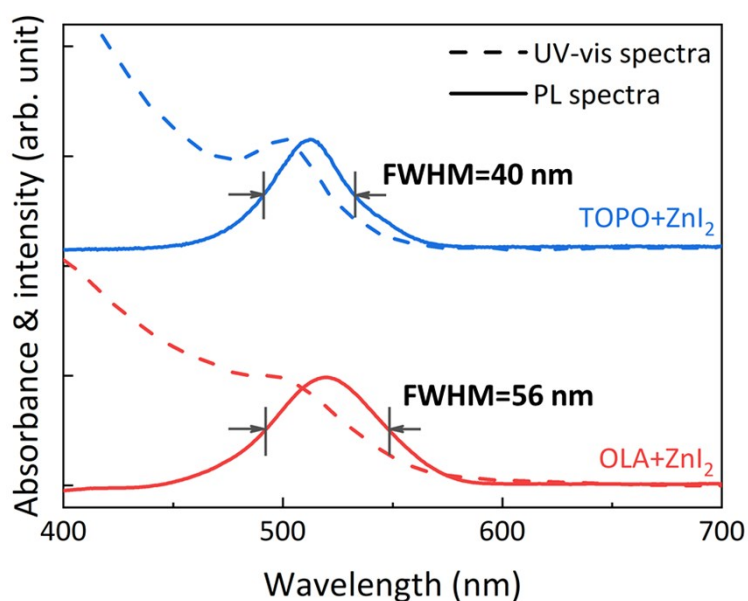

**Figure S5.** UV-vis and PL spectra of CdSe/ZnSe HNCs cation-exchanged with different precursors at 230 °C: blue and red lines are when 0.694 M TOPO or OLAm with 0.694 M  $\text{ZnI}_2$  were used, respectively. Reaction time was 360 min with TOPO and 30 min with OLAm, respectively.

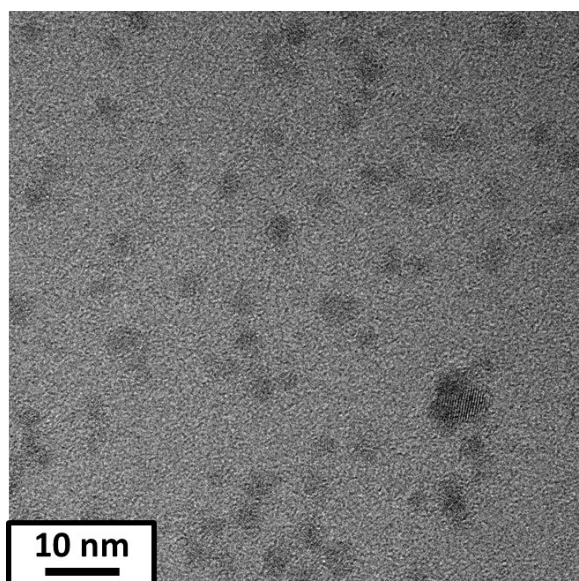

**Figure S6.** TEM images of CdSe/ZnSe NCs reacted with 0.694 M OLAm and ZnI<sub>2</sub> for 6 h at 230 °C. The size of CdSe/ZnSe NCs decreased from 3.6 nm (size of original CdSe NCs) to 3.1 nm.

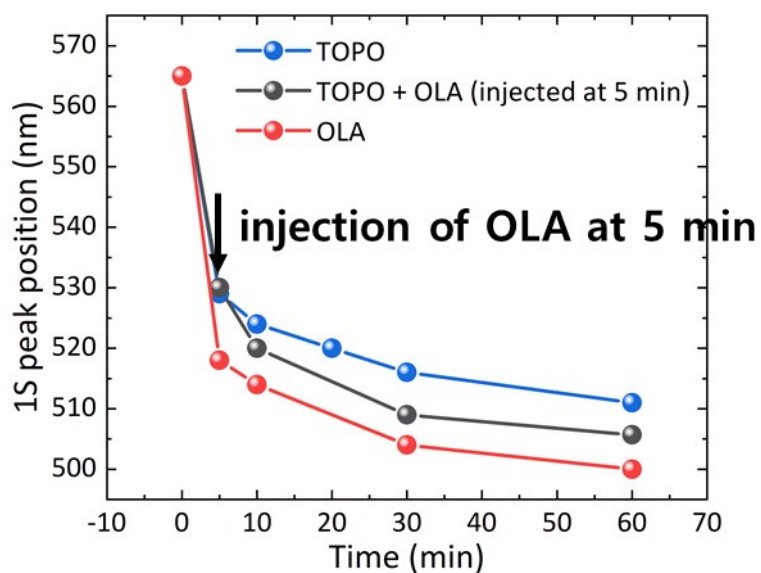

**Figure S7.** 1S exciton peak position changes of NCs mixed with 0.694 M of TOPO and ZnI<sub>2</sub> or 0.694 M of OLAm and ZnI<sub>2</sub>. For red line, 0.694 M OLAm was additionally injected at 5 min into the reaction flask containing 0.694 M TOPO and ZnI<sub>2</sub>.

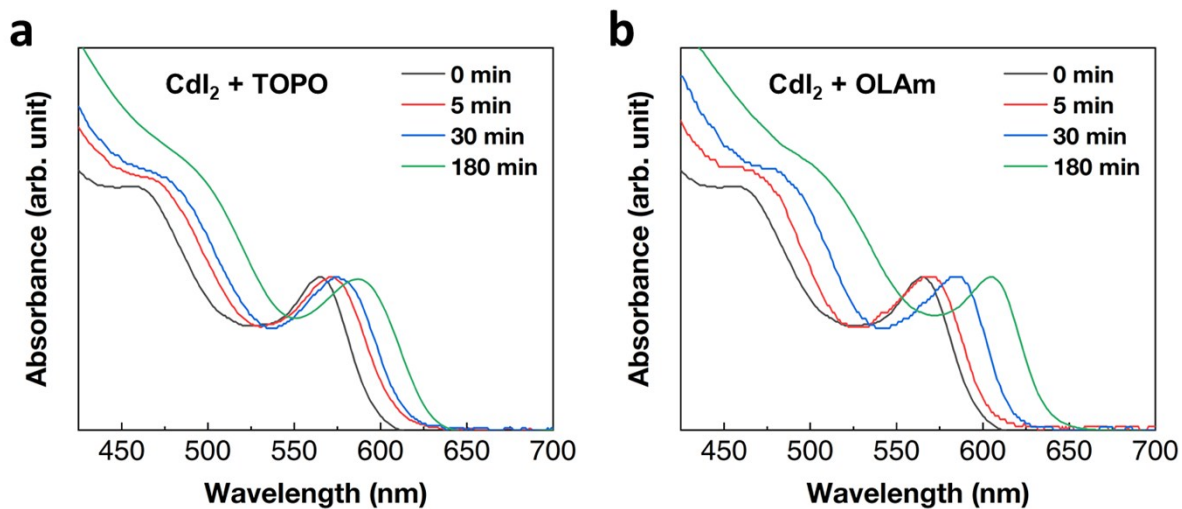

**Figure S8.** UV-vis absorption spectra of CdSe NCs after reaction using 0.694 M CdI<sub>2</sub> with TOPO or OLAm at 230 °C.

**Table S1.** Enthalpy changes of bulk transformation from CdSe(s) + ZnX<sub>2</sub>(s) to ZnSe(s) + CdX<sub>2</sub>(s), where X = Cl, Br, and I (unit: eV/formula unit)

|         | ZnCl <sub>2</sub> | ZnBr <sub>2</sub> | ZnI <sub>2</sub> |
|---------|-------------------|-------------------|------------------|
| zb-CdSe | 0.00              | -0.08             | -0.09            |
| wz-CdSe | -0.01             | -0.08             | -0.09            |

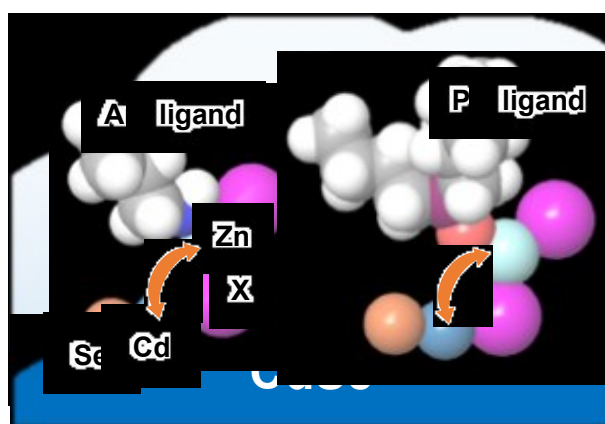

**Figure S9.** Simplified molecular model and schematic for cation exchange reaction between CdSe and ZnX<sub>2</sub>-ligand complex.

**Table S2.** Electrostatic potential (ESP) derived partial charge @ halogen species in ZnX<sub>2</sub>-ligand complexes

|           | ZnCl <sub>2</sub> | ZnBr <sub>2</sub> | ZnI <sub>2</sub> |
|-----------|-------------------|-------------------|------------------|
| No-ligand | -0.57             | -0.52             | -0.46            |
| Am-ligand | -0.61             | -0.56             | -0.50            |
| PO-ligand | -0.65             | -0.60             | -0.55            |

**Table S3.** PL QY and FWHM of CdSe/ZnSe NCs reacted with ZnI<sub>2</sub>+OLAm, ZnI<sub>2</sub>+TOPO, and ZnI<sub>2</sub>+TOPO+OLAm

|                             | PL QY | FWHM  |
|-----------------------------|-------|-------|
| OLAm-ZnI <sub>2</sub>       | 55%   | 56 nm |
| TOPO-ZnI <sub>2</sub>       | 35%   | 40 nm |
| TOPO-ZnI <sub>2</sub> +OLAm | 60%   | 41 nm |

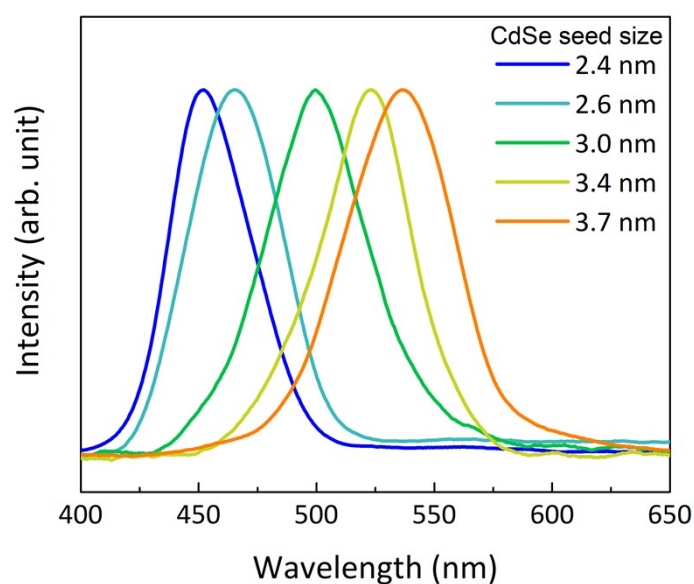

**Figure S10.** PL spectra of CdSe/ZnSe NCs cation-exchanged with different sizes of CdSe NCs.

PL intensity was normalized at the points of the respective photoluminescence peak positions.

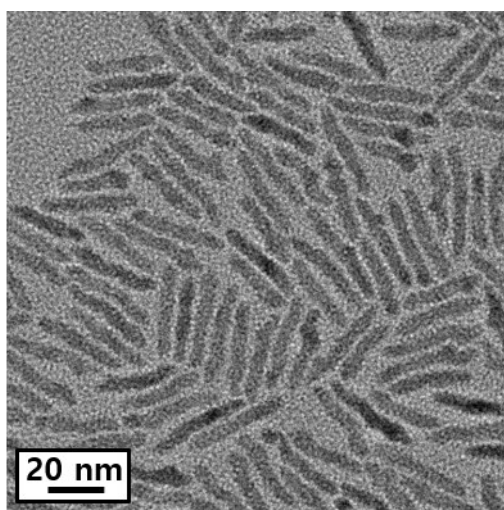

**Figure S11.** TEM image of CdSe NRs before cation exchange reaction

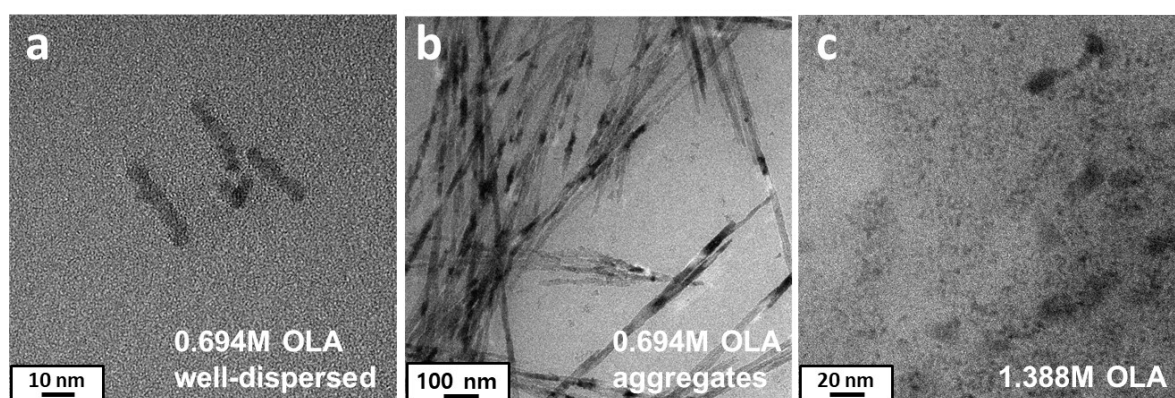

**Figure S12.** TEM images when (a, b) 0.694 M or (c) 1.388 M OLAm with 0.694 M  $\text{ZnI}_2$  were used for cation exchange of CdSe NRs. (a) and (b) images are well-dispersed products that were obtained *via* arrested precipitation and aggregates that were produced during cation exchange reaction, respectively.



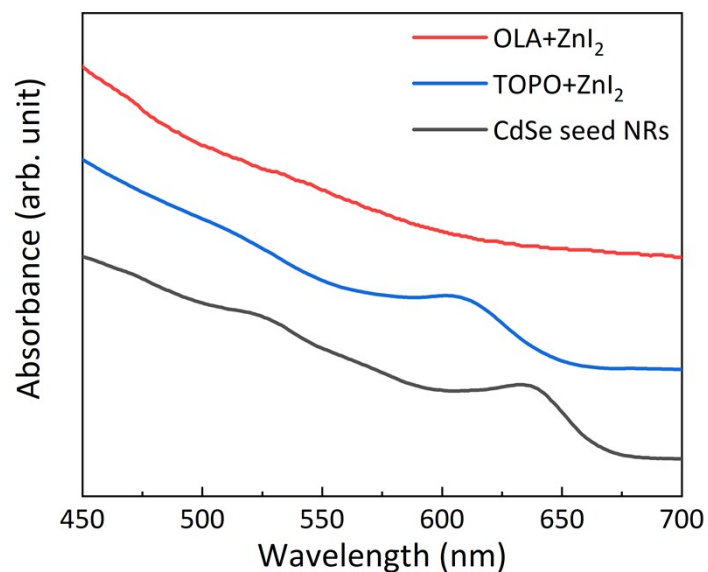

**Figure S13.** UV-vis spectra of CdSe NRs, CdSe/ZnSe cation-exchanged with 0.694 M TOPO+ZnI<sub>2</sub> or OLAm+ZnI<sub>2</sub> for 3 h at 300 °C.

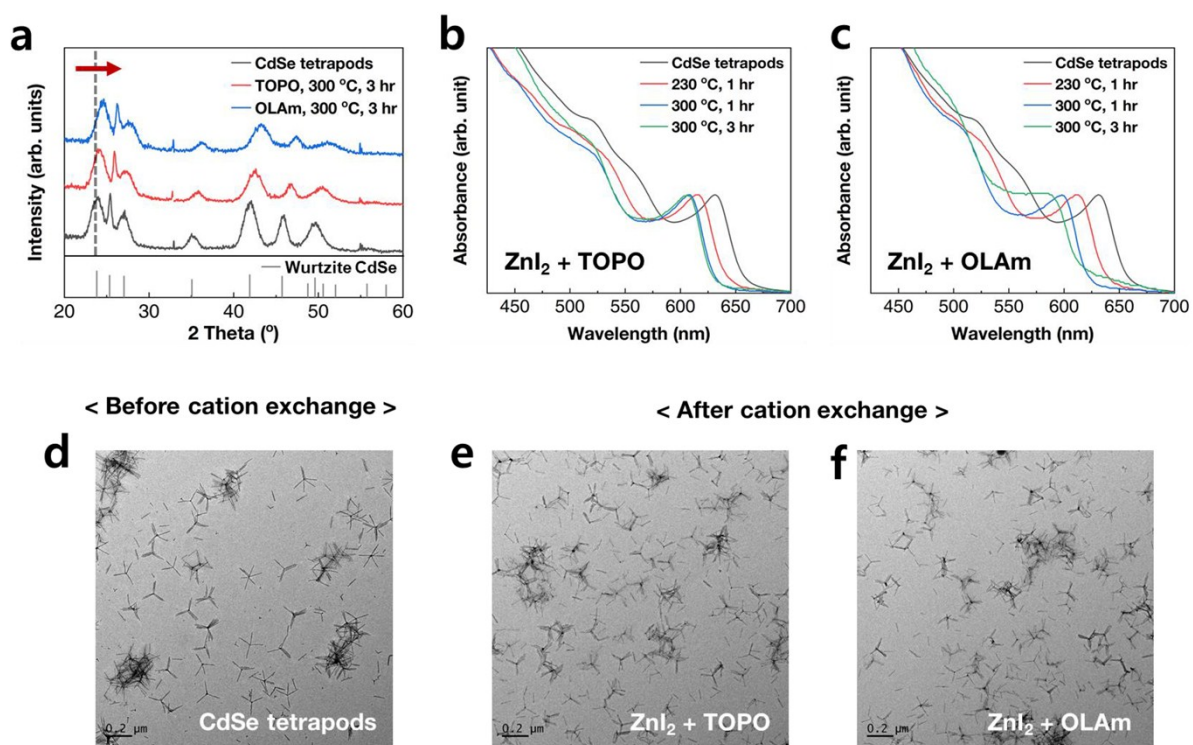

**Figure S14.** (a) XRD patterns and (b)-(c) UV-vis absorption spectra of CdSe tetrapods before and after cation exchange reaction using 0.694 M TOPO or OLAm with ZnI<sub>2</sub>. (d)-(f) TEM images of CdSe tetrapods before and after cation exchange reaction.

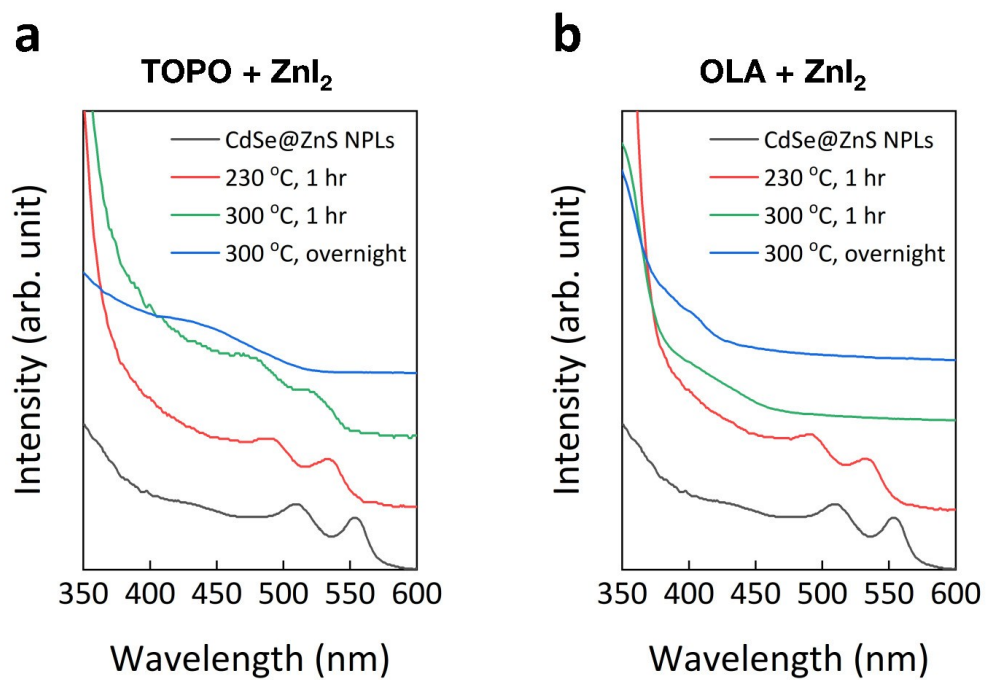

**Figure S15.** UV-vis spectra of CdSe/ZnS core/shell NPLs cation-exchanged using 0.694 M ZnI<sub>2</sub> with (a) TOPO or (b) OLAm.

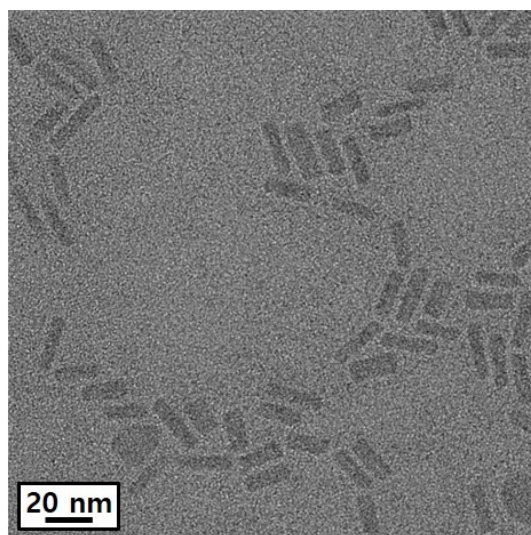

**Figure S16.** TEM image of CdSe/ZnS core/shell NPLs before cation exchange reaction
